# Supplementary material
Source: ML conference proceedings conference paper supplement (https://proceedings.neurips.cc/paper_files/paper/2012/hash/072b030ba126b2f4b2374f342be9ed44-Abstract.html)
Supplement: Supplementary file [file 072b030ba126b2f4b2374f342be9ed44-Supplemental.zip]

---

# Appendix to Super-Bit Locality-Sensitive Hashing

---

**Jianqiu Ji**

Tsinghua University  
jijq10@mails.tsinghua.edu.cn

**Jianmin Li**

Tsinghua University  
lijianmin@mail.tsinghua.edu.cn

**Shuicheng Yan**

National University of Singapore  
eleyans@nus.edu.sg

**Bo Zhang**

Tsinghua University  
dcszb@mail.tsinghua.edu.cn

**Qi Tian**

University of Texas at San Antonio  
qitian@cs.utsa.edu

## 1 Proof of Lemma 6

*Proof.* For the first part, by Lemma 5, we only need to prove  $Pr[X_i = 1|X_1 = 1] = Pr[X_2 = 1|X_1 = 1]$ .

$$Pr[X_i = 1|X_1 = 1] = \int Pr[X_i = 1|X_1 = 1, w_1]p(w_1|X_1 = 1)dw_1.$$

Without loss of generality, let  $\|w_1\| = 1$ . And expand  $w_1$  to  $[w_1, B_1]$  whose columns constitute the orthonormal bases of  $\mathbb{R}^d$ . Denote  $\tilde{a} = B_1^T a$ ,  $\tilde{b} = B_1^T b$ , and  $\tilde{w}_i = B_1^T w_i$ , for  $2 \leq i \leq d$ . Since  $w_i = B_1 B_1^T w_i = B_1 \tilde{w}_i$ , we have  $w_i^T a = \tilde{w}_i^T \tilde{a}$  and  $w_i^T b = \tilde{w}_i^T \tilde{b}$ ,  $2 \leq i \leq d$ . Then

$$Pr[X_i = 1|X_1 = 1, w_1] = Pr[\text{sgn}(w_i^T a) \neq \text{sgn}(w_i^T b)|X_1 = 1, w_1] = Pr[\text{sgn}(\tilde{w}_i^T \tilde{a}) \neq \text{sgn}(\tilde{w}_i^T \tilde{b})|X_1 = 1, w_1] = Pr[\text{sgn}(\tilde{w}_i^T \tilde{a}) \neq \text{sgn}(\tilde{w}_i^T \tilde{b})|w_1, a^T w_1 b^T w_1 < 0].$$

Therefore we only need to consider the subproblem: In a given  $(d-1)$ -dimensional subspace  $S_1^\perp$ , given data samples  $\tilde{a}, \tilde{b}$ , compute  $Pr[h_{\tilde{w}_i}(\tilde{a}) \neq h_{\tilde{w}_i}(\tilde{b})|w_1, a^T w_1 b^T w_1 < 0]$ . Let  $\tilde{v}_2 = B_1^T v_2, \dots, \tilde{v}_N = B_1^T v_N$ . It can be shown that given  $w_1, \{\tilde{v}_2, \dots, \tilde{v}_N\}$  are independent isotropic normal vectors in subspace  $S_1^\perp$ , and  $\tilde{w}_2, \dots, \tilde{w}_N$  are the result of Gram-Schmidt process applying to  $\{\tilde{v}_2, \dots, \tilde{v}_N\}$ . Apply Theorem 1 to this subproblem, we have  $Pr[h_{\tilde{w}_i}(\tilde{a}) \neq h_{\tilde{w}_i}(\tilde{b})|w_1, a^T w_1 b^T w_1 < 0] = \theta_{\tilde{a}, \tilde{b}}/\pi$ . Since  $\theta_{\tilde{a}, \tilde{b}}$  is a function of  $a, b, w_1$ ,  $Pr[X_i = 1|X_1 = 1, w_1] = \theta_{\tilde{a}, \tilde{b}}/\pi = Pr[X_2 = 1|X_1 = 1, w_1]$ , and  $Pr[X_i = 1|X_1 = 1] = Pr[X_2 = 1|X_1 = 1]$ .

For the second part it suffices to prove that if  $\theta_{a,b} \in (0, \frac{\pi}{2}]$ ,  $\theta_{\tilde{a}, \tilde{b}} < \theta_{a,b}$ , which is equal to prove that  $\cos \theta_{a,b} = \frac{a^T b}{\|a\| \|b\|} < \frac{\tilde{a}^T \tilde{b}}{\|\tilde{a}\| \|\tilde{b}\|} = \frac{a^T b - a^T w_1 w_1^T b}{\|a - w_1 w_1^T a\| \|b - w_1 w_1^T b\|} = \cos \theta_{\tilde{a}, \tilde{b}}$ . Since  $a^T b \geq 0$ ,  $(a^T w_1)(b^T w_1) < 0$ , we have  $\cos \theta_{\tilde{a}, \tilde{b}} > 0$ , thus it is equal to prove that  $\cos^2 \theta_{\tilde{a}, \tilde{b}} - \cos^2 \theta_{a,b} > 0$ , which is again equal to prove that  $(a^T b - a^T w_1 w_1^T b)^2 \|a\|^2 \|b\|^2 - (a^T b)^2 \|a - w_1 w_1^T a\|^2 \|b - w_1 w_1^T b\|^2 > 0$ . After some algebraic calculations we get that the left side equals to  $(\|a\|^2 \|b\|^2 - (a^T b)^2)(a^T w_1)^2 (b^T w_1)^2 + a^T b \|a\|^2 (a^T b (b^T w_1)^2 - \|b\|^2 b^T w_1 a^T w_1) + a^T b \|b\|^2 (a^T b (a^T w_1)^2 - \|a\|^2 a^T w_1 b^T w_1)$ .

Since  $a^T b \geq 0$ ,  $a^T w_1 b^T w_1 < 0$ ,  $\|a\|^2 \|b\|^2 > (a^T b)^2$ , the expression above is positive. Thus we have proved that  $\theta_{\tilde{a}, \tilde{b}} < \theta_{a,b}$ .

Therefore if  $\theta_{a,b} \in (0, \frac{\pi}{2}]$ ,  $Pr[X_2 = 1|X_1 = 1] = \int Pr[X_2 = 1|X_1 = 1, w_1]p(w_1|X_1 = 1)dw_1 = \int \frac{\theta_{\tilde{a}, \tilde{b}}}{\pi} p(w_1|X_1 = 1)dw_1 < \int \frac{\theta_{a,b}}{\pi} p(w_1|X_1 = 1)dw_1 = \frac{\theta_{a,b}}{\pi}$   $\square$
